# Supplementary material for: Tumor Mutational Burden as a Predictor of Survival with Durvalumab and/or Tremelimumab Treatment in Recurrent or Metastatic Head and Neck Squamous Cell Carcinoma
Source: PubMed Central journal article supplement — Clin Cancer Res. 2023 Feb 20;29(11):2066–74. doi: 10.1158/1078-0432.CCR-22-2765 (PMC10233352; doi:10.1158/1078-0432.ccr-22-2765), 2023-02-20
Supplement: ccr-22-2765_figure_s1_suppfs1.pdf [file ccr-22-2765_figure_s1_suppfs1.pdf]

**FIG S1.** TMB distribution in samples from HAWK and CONDOR (A) and EAGLE (B).

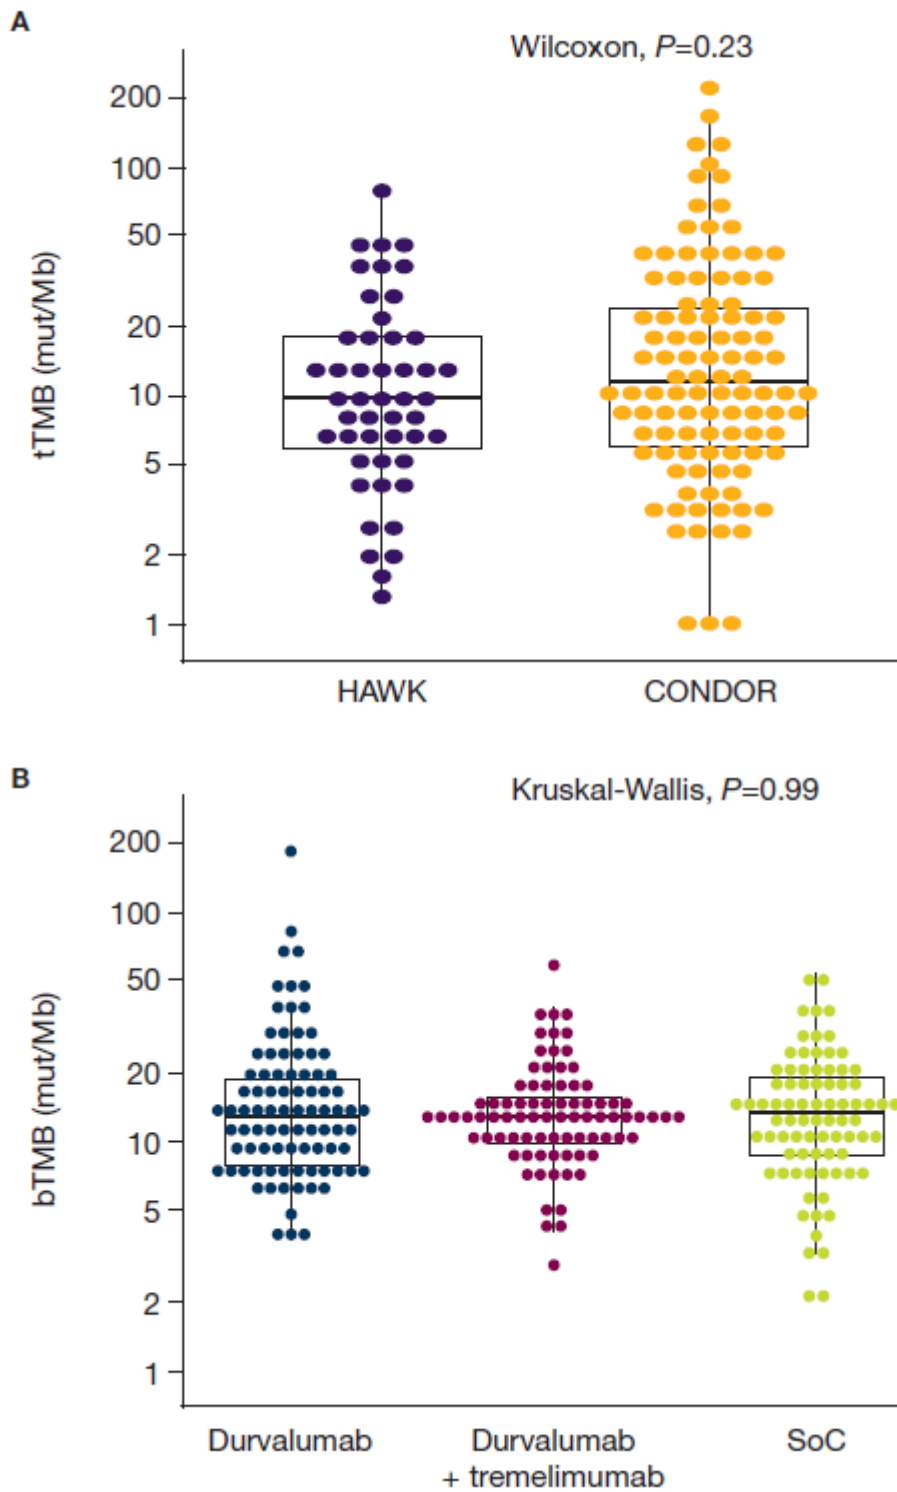

bTMB, blood plasma tumor mutational burden; SoC, standard of care; tTMB, tissue tumor mutational burden.
