# Supplementary material for: Tumor Mutational Burden as a Predictor of Survival with Durvalumab and/or Tremelimumab Treatment in Recurrent or Metastatic Head and Neck Squamous Cell Carcinoma
Source: PubMed Central journal article supplement — Clin Cancer Res. 2023 Feb 20;29(11):2066–74. doi: 10.1158/1078-0432.CCR-22-2765 (PMC10233352; doi:10.1158/1078-0432.ccr-22-2765), 2023-02-20
Supplement: ccr-22-2765_figure_s2_suppfs2.pdf [file ccr-22-2765_figure_s2_suppfs2.pdf]

**FIG S2.** Kaplan-Meier plot of OS in the durvalumab monotherapy, durvalumab plus tremelimumab and SoC treatment arms in the NLR  $\leq 7$  subgroup (A) and NLR  $> 7$  subgroup (B) in EAGLE.

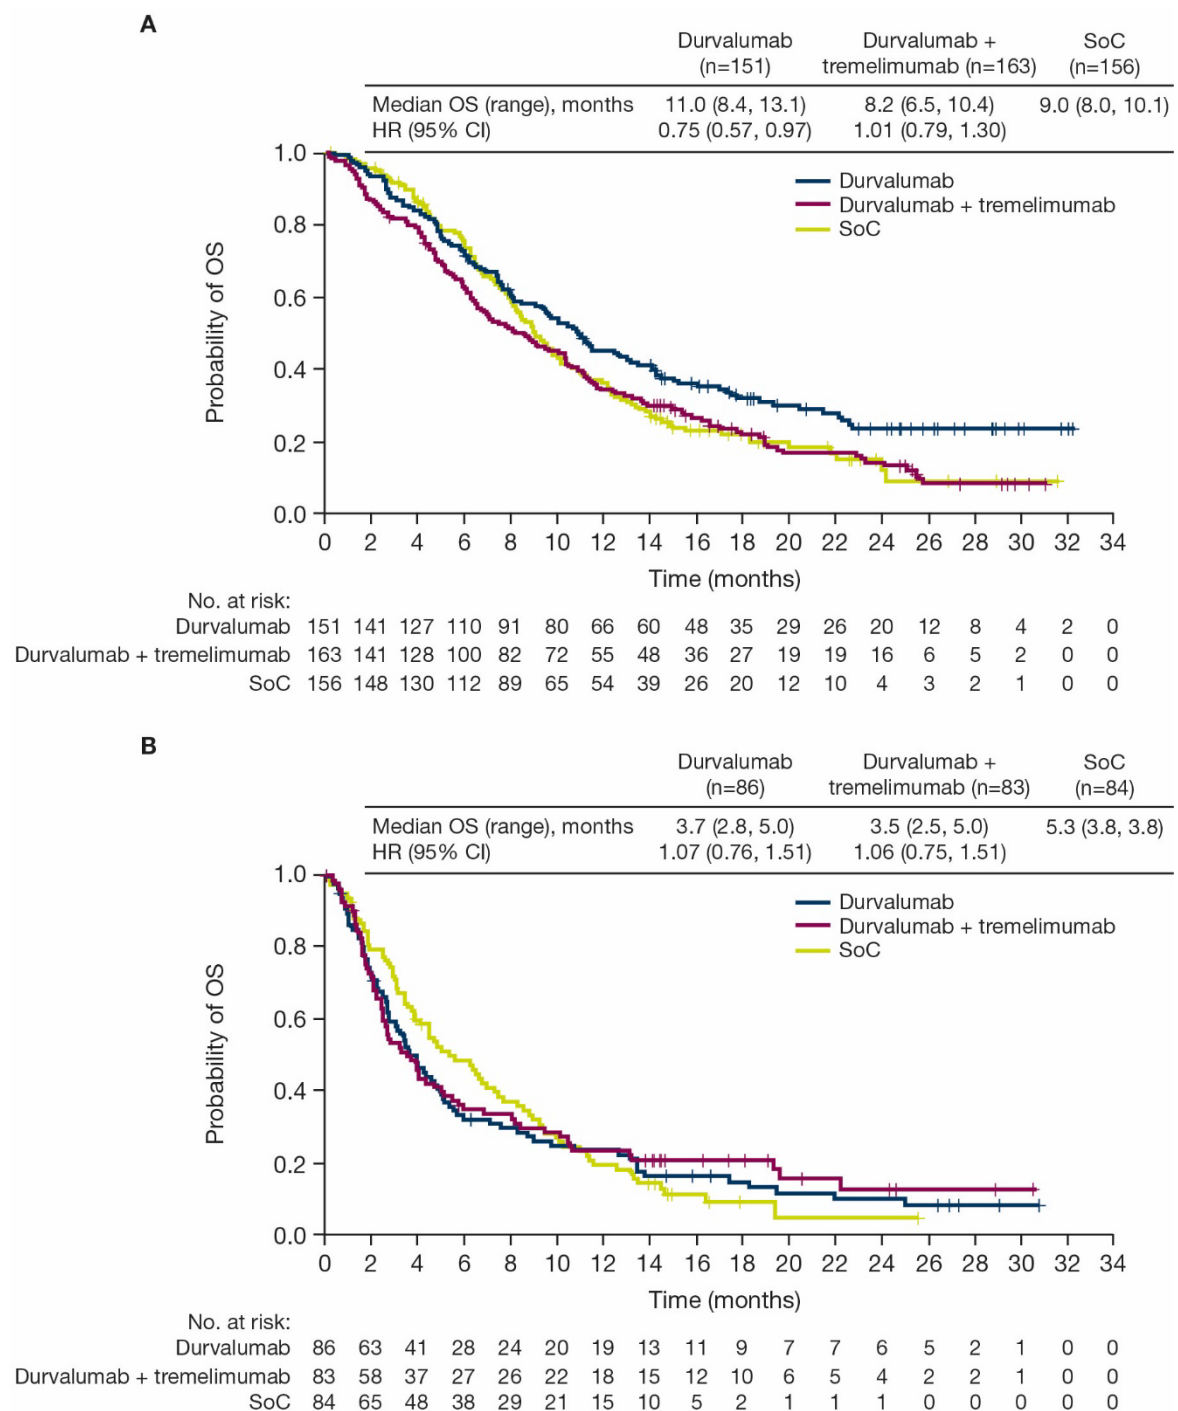

CI, confidence interval; HR, hazard ratio; NLR, neutrophil-to-lymphocyte ratio; OS, overall survival; SoC, standard of care.
