# Supplementary material for: Tumor Mutational Burden as a Predictor of Survival with Durvalumab and/or Tremelimumab Treatment in Recurrent or Metastatic Head and Neck Squamous Cell Carcinoma
Source: PubMed Central journal article supplement — Clin Cancer Res. 2023 Feb 20;29(11):2066–74. doi: 10.1158/1078-0432.CCR-22-2765 (PMC10233352; doi:10.1158/1078-0432.ccr-22-2765), 2023-02-20
Supplement: ccr-22-2765_supplementary_data1_suppds1.pdf [file ccr-22-2765_supplementary_data1_suppds1.pdf]

## SUPPLEMENTARY MATERIAL

**TABLE S1.** Patient Demographics and Disease Characteristics in the Intent-to-Treat and Biomarker-Evaluable Populations

| Characteristic                | HAWK/CONDOR <sup>a</sup> |                              | EAGLE          |                              |
|-------------------------------|--------------------------|------------------------------|----------------|------------------------------|
|                               | ITT<br>(N=379)           | tTMB<br>evaluable<br>(n=153) | ITT<br>(N=736) | bTMB<br>evaluable<br>(n=247) |
| Age (years), median           | 61                       | 60                           | 60             | 61                           |
| Age <65 years, n (%)          | 259 (68.3)               | 106 (69.2)                   | 514 (69.8)     | 173 (70.0)                   |
| Sex, male, n (%)              | 300 (79.2)               | 114 (74.5)                   | 618 (84.0)     | 208 (84.2)                   |
| Race, n (%)                   |                          |                              |                |                              |
| White                         | 330 (87.1)               | 132 (86.3)                   | 591 (80.3)     | 185 (74.9)                   |
| Asian                         | 13 (3.4)                 | 2 (1.3)                      | 113 (15.4)     | 52 (21.1)                    |
| Other                         | 36 (9.5)                 | 19 (12.4)                    | 32 (4.3)       | 10 (4.0)                     |
| ECOG PS, n (%) <sup>b</sup>   |                          |                              |                |                              |
| 0                             | 115 (30.4)               | 37 (24.2)                    | 205 (27.9)     | 79 (32.0)                    |
| 1                             | 263 (69.6)               | 116 (75.8)                   | 531 (72.1)     | 168 (68.0)                   |
| Smoking status, n (%)         |                          |                              |                |                              |
| Never smoker                  | 86 (22.7)                | 38 (24.8)                    | 155 (21.1)     | 52 (21.1)                    |
| Ever smoker                   | 293 (77.3)               | 115 (75.2)                   | 581 (78.9)     | 195 (78.9)                   |
| Primary tumor location, n (%) |                          |                              |                |                              |
| Oral cavity                   | 101 (26.6)               | 44 (28.8)                    | 190 (25.8)     | 57 (23.1)                    |
| Oropharynx                    | 147 (38.8)               | 66 (43.1)                    | 274 (37.2)     | 100 (40.5)                   |
| Hypopharynx                   | 52 (13.7)                | 18 (11.8)                    | 129 (17.5)     | 47 (19.0)                    |

|                                |            |            |            |            |
|--------------------------------|------------|------------|------------|------------|
| Larynx                         | 75 (19.8)  | 24 (15.7)  | 115 (15.6) | 36 (14.6)  |
| PD-L1 high, n (%)              | 112 (29.6) | 50 (32.7)  | 212 (28.8) | 81 (32.8)  |
| HPV status, n (%) <sup>b</sup> |            |            |            |            |
| Positive                       | 116 (32.4) | 46 (31.5)  | 126 (24.6) | 45 (19.4)  |
| Negative                       | 242 (67.6) | 100 (68.5) | 387 (75.4) | 187 (80.6) |

---

Abbreviations: bTMB, blood plasma tumor mutational burden; ECOG PS, Eastern Cooperative Oncology Group performance status; HPV, human papillomavirus; IHC, immunohistochemistry; ITT, intent-to-treat; PD-L1, programmed cell death-ligand 1; tTMB, tissue tumor mutational burden.

<sup>a</sup>Data include the durvalumab monotherapy arms of HAWK and CONDOR and the durvalumab plus tremelimumab arm and tremelimumab monotherapy arm of CONDOR.

<sup>b</sup>Data not available for all patients. In HAWK and CONDOR, HPV status was collected from historical medical records or tested centrally. In EAGLE, HPV was tested locally by any method or centrally. Central HPV testing was using p16 IHC.

**TABLE S2.** Baseline Demographic and Disease Characteristics of Patients in the High-tTMB ( $\geq 10$  mut/Mb) and Low-tTMB ( $< 10$  mut/Mb) Subgroups from HAWK/CONDOR

| <b>Characteristic</b>         | <b>tTMB<math>\geq 10</math><br/>mut/Mb (n=84)</b> | <b>tTMB <math>&lt; 10</math><br/>mut/Mb (n=69)</b> | <b>P value</b> |
|-------------------------------|---------------------------------------------------|----------------------------------------------------|----------------|
| Age (years), median           | 62                                                | 59                                                 | 0.052          |
| Age $< 65$ years, n (%)       | 54 (64.3)                                         | 52 (75.4)                                          | 0.193          |
| Sex, male, n (%)              | 68 (81.0)                                         | 46 (66.7)                                          | 0.067          |
| Race, n (%)                   |                                                   |                                                    |                |
| White                         | 73 (86.9)                                         | 59 (85.5)                                          | 0.989          |
| Asian                         | 1 (1.2)                                           | 1 (1.4)                                            | 1.000          |
| Other                         | 10 (11.9)                                         | 9 (13.0)                                           | 1.000          |
| ECOG PS, n (%)                |                                                   |                                                    |                |
| 0                             | 17 (20.2)                                         | 20 (29.0)                                          | 0.286          |
| 1                             | 67 (79.8)                                         | 49 (71.0)                                          | 0.286          |
| Smoking status, n (%)         |                                                   |                                                    |                |
| Never smoker                  | 14 (16.7)                                         | 24 (34.8)                                          | 0.017          |
| Ever smoker                   | 70 (83.3)                                         | 45 (65.2)                                          | 0.017          |
| Primary tumor location, n (%) |                                                   |                                                    |                |
| Oral cavity                   | 20 (23.8)                                         | 24 (34.8)                                          | 0.189          |
| Oropharynx                    | 35 (41.7)                                         | 31 (44.9)                                          | 0.810          |
| Hypopharynx                   | 11 (13.1)                                         | 7 (10.1)                                           | 0.755          |
| Larynx                        | 17 (20.2)                                         | 7 (10.1)                                           | 0.138          |
| PD-L1 status, n (%)           |                                                   |                                                    |                |
| High                          | 23 (27.4)                                         | 27 (39.1)                                          | 0.171          |
| Low                           | 61 (72.6)                                         | 42 (60.9)                                          | 0.171          |

HPV status, n (%)<sup>a</sup>

|          |           |           |       |
|----------|-----------|-----------|-------|
| Positive | 24 (30.4) | 22 (32.8) | 0.889 |
| Negative | 55 (69.6) | 45 (67.2) | 0.889 |

---

Abbreviations: HPV, human papillomavirus; IHC, immunohistochemistry; mut/Mb, mutations/megabase; PD-L1, programmed cell death-ligand 1; tTMB, tissue tumor mutational burden.

<sup>a</sup>Data not available for all patients. HPV status was collected from historical medical records or tested centrally.

Central HPV testing was using p16 IHC.

**TABLE S3.** Baseline Demographic and Disease Characteristics of Patients in the Biomarker-Evaluable Population, High-bTMB ( $\geq 16$  mut/Mb) Subgroup, and Low-bTMB ( $<16$  mut/Mb) Subgroup from EAGLE

| Characteristic                | bTMB $\geq 16$ mut/Mb<br>(n=74) | bTMB $<16$ mut/Mb<br>(n=173) | <i>P</i> value |
|-------------------------------|---------------------------------|------------------------------|----------------|
| Age (years), median           | 60                              | 61                           | 0.361          |
| Age $<65$ years, n (%)        | 54 (73.0)                       | 119 (68.4)                   | 0.613          |
| Sex, male, n (%)              | 64 (86.5)                       | 144 (83.2)                   | 0.652          |
| Race, n (%)                   |                                 |                              |                |
| White                         | 56 (75.7)                       | 129 (74.6)                   | 0.981          |
| Asian                         | 10 (13.5)                       | 42 (24.3)                    | 0.084          |
| Other                         | 8 (10.8)                        | 2 (1.2)                      | 0.002          |
| ECOG PS, n (%)                |                                 |                              |                |
| 0                             | 21 (28.4)                       | 58 (33.5)                    | 0.519          |
| 1                             | 53 (71.6)                       | 115 (66.5)                   | 0.519          |
| Smoking status, n (%)         |                                 |                              |                |
| Never smoker                  | 12 (16.2)                       | 40 (23.1)                    | 0.294          |
| Ever smoker                   | 62 (83.8)                       | 133 (76.9)                   | 0.294          |
| Primary tumor location, n (%) |                                 |                              |                |
| Oral cavity                   | 16 (21.6)                       | 41 (23.7)                    | 0.849          |
| Oropharynx                    | 26 (35.1)                       | 74 (42.8)                    | 0.328          |
| Hypopharynx                   | 18 (24.3)                       | 29 (16.8)                    | 0.226          |
| Larynx                        | 12 (16.2)                       | 24 (13.9)                    | 0.779          |
| PD-L1 status, n (%)           |                                 |                              |                |
| High                          | 23 (31.1)                       | 58 (33.5)                    | 0.052          |

|                                  |           |            |       |
|----------------------------------|-----------|------------|-------|
| Low                              | 51 (68.9) | 115 (66.5) | 0.052 |
| HPV positive, n (%) <sup>a</sup> |           |            |       |
| Positive                         | 12 (17.6) | 33 (20.1)  | 0.801 |
| Negative                         | 56 (82.4) | 131 (79.9) | 0.801 |

Abbreviations: bTMB, blood plasma tumor mutational burden; HPV, human papilloma virus; IHC, immunohistochemistry; mut/Mb, mutations/megabase; PD-L1, programmed cell death-ligand 1.

<sup>a</sup>Data not available for all patients. HPV was tested locally by any method or centrally. Central HPV testing was using p16 IHC.

**TABLE S4.** OS HRs for Durvalumab and Durvalumab plus Tremelimumab versus SoC in Subgroups of Patients in EAGLE by PD-L1 Expression and bTMB

|            | <b>Durvalumab</b> |                        |                 |                        | <b>Durvalumab plus tremelimumab</b> |                        |                 |                        |
|------------|-------------------|------------------------|-----------------|------------------------|-------------------------------------|------------------------|-----------------|------------------------|
|            | <b>bTMB-high</b>  |                        | <b>bTMB-low</b> |                        | <b>bTMB-high</b>                    |                        | <b>bTMB-low</b> |                        |
|            | <b>n</b>          | <b>HR<br/>(95% CI)</b> | <b>n</b>        | <b>HR<br/>(95% CI)</b> | <b>n</b>                            | <b>HR<br/>(95% CI)</b> | <b>n</b>        | <b>HR<br/>(95% CI)</b> |
| PD-L1 high | 17                | 0.25<br>(0.06- 1.03)   | 34              | 0.74<br>(0.32- 1.70)   | 13                                  | 0.21<br>(0.04- 1.16)   | 44              | 1.03<br>(0.53- 2.02)   |
| PD-L1 low  | 37                | 0.50<br>(0.23- 1.07)   | 76              | 0.89<br>(0.55- 1.44)   | 34                                  | 0.50<br>(0.23- 1.09)   | 72              | 0.77<br>(0.47-1.27)    |

Abbreviations: bTMB, blood plasma tumor mutational burden; CI, confidence interval; HR, hazard ratio; OS, overall survival; PD-L1, programmed cell death-ligand 1; SoC, standard of care.

HRs were calculated as durvalumab with/without tremelimumab versus chemotherapy.
